# Supplementary material for: Gene expression profiling of fibroblasts in a family with LMNA-related cardiomyopathy reveals molecular pathways implicated in disease pathogenesis
Source: PubMed Central journal article supplement (PMC7374820; doi:10.1186/s12881-020-01088-w), 2020-07-22
Supplement: 12881_2020_1088_MOESM1_ESM.pdf [file 12881_2020_1088_MOESM1_ESM.pdf]

**Table S1: Sequencing statistics**

| <b>Group</b>          | <b>SampleID</b> | <b>Total Number of Reads<br/>(left+right)</b> | <b>Overall read<br/>mapping rate</b> | <b>Concordant Pair<br/>Alignment Rate</b> |
|-----------------------|-----------------|-----------------------------------------------|--------------------------------------|-------------------------------------------|
| Unrelated<br>controls | RNA1_U1         | 116,415,950                                   | 88.6%                                | 83.6%                                     |
|                       | RNA2_U2         | 119,163,654                                   | 90.8%                                | 86.2%                                     |
|                       | RNA3_U3         | 127,339,996                                   | 92.4%                                | 88.1%                                     |
| Controls              | RNA4_C1         | 119,696,150                                   | 88.9%                                | 84.0%                                     |
|                       | RNA5_C2         | 123,096,068                                   | 89.4%                                | 84.7%                                     |
|                       | RNA6_C3         | 112,137,798                                   | 89.1%                                | 84.4%                                     |
| Patients              | RNA7_P1         | 159,013,354                                   | 88.8%                                | 84.0%                                     |
|                       | RNA8_P2         | 142,759,722                                   | 91.9%                                | 87.3%                                     |
|                       | RNA9_P3         | 140,901,146                                   | 91.4%                                | 87.1%                                     |

**Table S2: qPCR primer sequences**

| <b>Gene name (Symbol)</b>                                 | <b>Primer sequence (5'→ 3')</b>                          |
|-----------------------------------------------------------|----------------------------------------------------------|
| Lamin A ( <i>LMNA</i> )                                   | CTC CAC ATC TGC CTT AAA AC<br>GCT AGC CTC TAT AAA AGC AC |
| Lamin C ( <i>LMNC</i> )                                   | AGA ACA TCT ACA GTG AGG AG<br>CAG AAT AAG TCT TCT CCA GC |
| Lamin B1 ( <i>LMNB1</i> )                                 | GCG TGC GTG TCT ATG CTA AG<br>TCA TGC GGC TTT CCA TCA GT |
| Lamin B2 ( <i>LMNB2</i> )                                 | TTT TCC ACC AAC AGG GGG AC<br>ACG TTC TGG CAG TTC GCT TA |
| Insulin Growth Factor binding protein 5 ( <i>IGFBP5</i> ) | GCC CTC CAC CTC TCT CTA CA<br>TCA CGG GAG TCT CTC TCG AT |
| Housekeeping gene: Beta actin ( <i>ACTB</i> )             | GAC GAC ATG GAG AAA ATC TG<br>ATG ATC TGG GTC ATC TTC TC |

**Table S3: RNA-seq expression values for *LMNA*, *LMNC*, and *IGFBP5***

| <b>Sample</b>          | <b>LMNA_NM_170707</b> | <b>LMNC_NM_005572</b> | <b>LMNA<br/>to<br/>LMNC<br/>ratio</b> | <b>IGFBP5_NM_000599</b> |
|------------------------|-----------------------|-----------------------|---------------------------------------|-------------------------|
| All Unrelated Controls | 124.946               | 300.189               | 0.416                                 | 152.317                 |
| U1                     | 122.652               | 322.642               | 0.380                                 | 26.8803                 |
| U2                     | 136.26                | 343.83                | 0.396                                 | 57.5047                 |
| U3                     | 115.927               | 234.096               | 0.495                                 | 372.565                 |
|                        |                       |                       |                                       |                         |
| All Controls           | 116.521               | 280.476               | 0.415                                 | 125.739                 |
| C1                     | 127.337               | 317.053               | 0.402                                 | 65.8477                 |
| C2                     | 112.905               | 273.745               | 0.412                                 | 127.077                 |
| C3                     | 109.32                | 250.63                | 0.436                                 | 184.293                 |
|                        |                       |                       |                                       |                         |
| All Patients           | 67.6258               | 172.028               | 0.393                                 | 17.7081                 |
| P1                     | 69.795                | 196.989               | 0.354                                 | 9.63751                 |
| P2                     | 72.2225               | 171.963               | 0.420                                 | 5.8749                  |
| P3                     | 60.8598               | 147.132               | 0.414                                 | 37.6119                 |
